# Supplementary material for: Enhanced electron collection in a particulate LaTiO2N photoanode assembled with an inserted ZnO nanorod array for photoelectrochemical water oxidation
Source: Royal Society of Chemistry journal article supplement (doi:10.1039/d3se00341h), 2023-01-01
Supplement: d3se00341h1.pdf [file d3se00341h1.pdf]

## Supplementary information for

### Enhanced Electron Collection in a Particulate $\text{LaTiO}_2\text{N}$ Photoanode for Photoelectrochemical Water Splitting

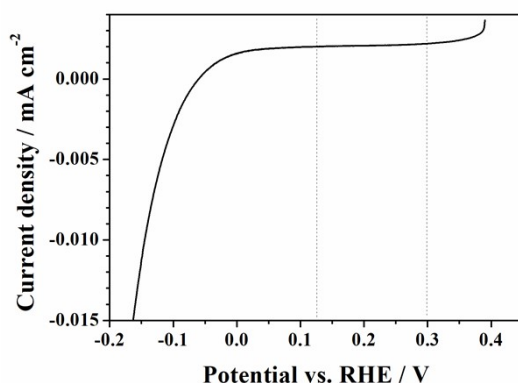

**Fig. S1** Current-potential characteristics of the  $\text{LaTiO}_2\text{N}(\text{as})$  particle electrodes on Al substrates. The two dotted lines show the potential range where there is only capacitive charging current but no Faraday current, which is used for Mott-Schottky plots.

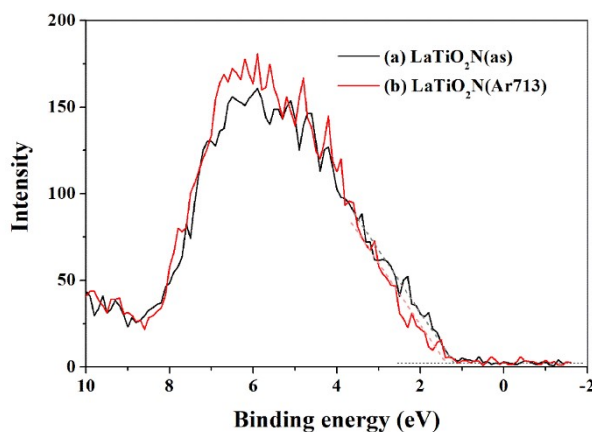

**Fig. S2** X-ray photoelectron spectra of valence band of (a) as-prepared  $\text{LaTiO}_2\text{N}$ ; (b)  $\text{LaTiO}_2\text{N}$  treated in Ar at 713 °C.

The valence band (VB) X-ray photoelectron spectra were obtained with 60 scans on an X-ray photoelectron spectrometer (ESCALAB250Xi, Al  $K_{\alpha}$ , 1486.6 eV) using contamination C1s (284.8 eV) for the calibration. The significant increase of electron carrier density in the bulk would elevate the position of Fermi level relative to the top of valence band. As shown by valence band X-ray photoelectron spectra, the binding energy at valence band edge is increased somewhat for  $\text{LaTiO}_2\text{N}(\text{Ar713})$  compared with  $\text{LaTiO}_2\text{N}(\text{as})$ . This indicates that the distance between the Fermi level and the valence band top is increased, which is consistent with the results of Mott-Schottky analysis.

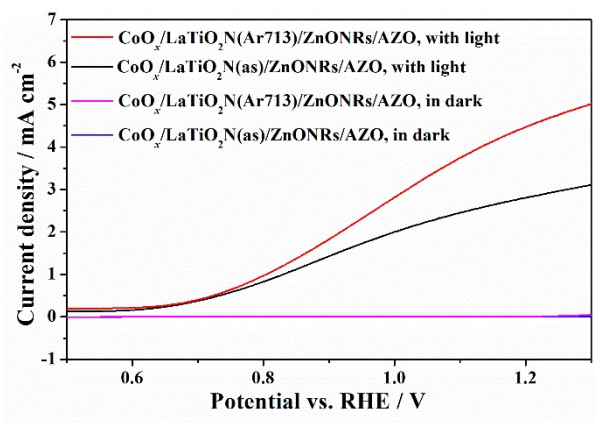

**Fig. S3** Current-potential characteristics of photoanodes in 0.1 M NaOH + 0.1 M Na<sub>2</sub>SO<sub>3</sub> under AM 1.5G irradiation or in dark

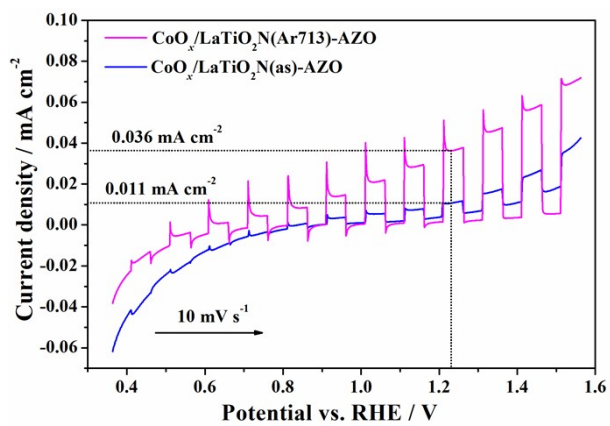

**Fig. S4** Current-potential characteristics of photoanodes in 0.1 M NaOH under chopped AM 1.5G irradiation.

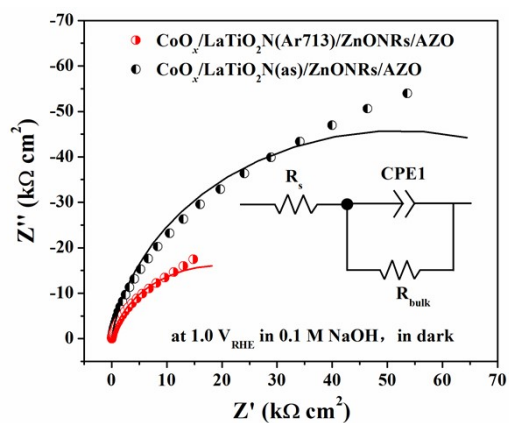

**Fig. S5** Electrochemical impedance spectra of photoanodes in 0.1 M NaOH in dark. The dark impedances are very large at low frequencies, so the fitting errors are large, but the equivalent circuit can be used to fit well in the high-frequency region. It is shown that the bulk resistance of  $\text{CoO}_x/\text{LaTiO}_2\text{N(Ar713)}/\text{ZnONRs}/\text{AZO}$  electrode in dark is less than that of  $\text{CoO}_x/\text{LaTiO}_2\text{N(as)}/\text{ZnONRs}/\text{AZO}$  electrode (Table S3).

**Table S1** Fitting parameters of EIS Nyquist curve for CoO<sub>x</sub>/LaTiO<sub>2</sub>N-AZO photoanodes under AM 1.5G irradiation

| Element                                        | Value                   | Error                   | Error% | Value                                             | Error                   | Error% |
|------------------------------------------------|-------------------------|-------------------------|--------|---------------------------------------------------|-------------------------|--------|
| CoO <sub>x</sub> /LaTiO <sub>2</sub> N(as)-AZO |                         |                         |        | CoO <sub>x</sub> /LaTiO <sub>2</sub> N(Ar713)-AZO |                         |        |
| R <sub>s</sub> /Ω cm <sup>2</sup>              | 13.9                    | 0.0644                  | 0.462  | 12.3                                              | 0.0769                  | 0.624  |
| CPE-T                                          | 2.14 × 10 <sup>-5</sup> | 1.06 × 10 <sup>-7</sup> | 0.494  | 1.17 × 10 <sup>-5</sup>                           | 8.93 × 10 <sup>-8</sup> | 0.761  |
| CPE-P                                          | 0.899                   | 9.36 × 10 <sup>-4</sup> | 0.104  | 0.945                                             | 1.30 × 10 <sup>-3</sup> | 0.139  |
| R <sub>bulk</sub> /Ω cm <sup>2</sup>           | 1.06 × 10 <sup>5</sup>  | 1.97 × 10 <sup>3</sup>  | 1.85   | 3.94 × 10 <sup>4</sup>                            | 371                     | 0.940  |

**Table S2** Fitting parameters of EIS Nyquist curve for CoO<sub>x</sub>/LaTiO<sub>2</sub>N/ZnONRs/AZO photoanodes under AM 1.5G irradiation

| Element                                               | Value                   | Error                   | Error% | Value                                                    | Error                   | Error% |
|-------------------------------------------------------|-------------------------|-------------------------|--------|----------------------------------------------------------|-------------------------|--------|
| CoO <sub>x</sub> /LaTiO <sub>2</sub> N(as)/ZnONRs/AZO |                         |                         |        | CoO <sub>x</sub> /LaTiO <sub>2</sub> N(Ar713)/ZnONRs/AZO |                         |        |
| R <sub>s</sub> /Ω cm <sup>2</sup>                     | 10.2                    | 0.0166                  | 0.163  | 10.4                                                     | 0.0216                  | 0.208  |
| CPE2-T                                                | 9.18 × 10 <sup>-5</sup> | 1.42 × 10 <sup>-5</sup> | 1.54   | 1.58 × 10 <sup>-4</sup>                                  | 2.80 × 10 <sup>-5</sup> | 1.77   |
| CPE2-P                                                | 0.828                   | 5.64 × 10 <sup>-3</sup> | 0.681  | 0.871                                                    | 5.61 × 10 <sup>-3</sup> | 0.645  |
| R <sub>ct</sub> /Ω cm <sup>2</sup>                    | 78.0                    | 0.583                   | 0.748  | 68.0                                                     | 0.448                   | 0.659  |
| CPE1-T                                                | 8.09 × 10 <sup>-5</sup> | 1.73 × 10 <sup>-6</sup> | 2.14   | 4.08 × 10 <sup>-4</sup>                                  | 2.12 × 10 <sup>-5</sup> | 5.19   |
| CPE1-P                                                | 0.821                   | 2.54 × 10 <sup>-3</sup> | 0.310  | 0.761                                                    | 6.56 × 10 <sup>-3</sup> | 0.861  |
| R <sub>bulk</sub> /Ω cm <sup>2</sup>                  | 53.4                    | 0.422                   | 0.789  | 19.7                                                     | 0.357                   | 1.81   |

**Table S3** Fitting parameters of EIS Nyquist curve for CoO<sub>x</sub>/LaTiO<sub>2</sub>N/ZnORs/AZO photoanodes in dark

| Element                                               | Value                   | Error                   | Error% | Value                                                    | Error                   | Error% |
|-------------------------------------------------------|-------------------------|-------------------------|--------|----------------------------------------------------------|-------------------------|--------|
| CoO <sub>x</sub> /LaTiO <sub>2</sub> N(as)/ZnONRs/AZO |                         |                         |        | CoO <sub>x</sub> /LaTiO <sub>2</sub> N(Ar713)/ZnONRs/AZO |                         |        |
| R <sub>s</sub> /Ω cm <sup>2</sup>                     | 10.4                    | 0.0829                  | 0.794  | 10.4                                                     | 0.0484                  | 0.464  |
| CPE-T                                                 | 2.70 × 10 <sup>-5</sup> | 2.37 × 10 <sup>-7</sup> | 0.879  | 1.15 × 10 <sup>-4</sup>                                  | 6.40 × 10 <sup>-6</sup> | 0.558  |
| CPE-P                                                 | 0.918                   | 1.74 × 10 <sup>-3</sup> | 0.190  | 0.876                                                    | 1.30 × 10 <sup>-3</sup> | 0.148  |
| R <sub>bulk</sub> /Ω cm <sup>2</sup>                  | 1.04 × 10 <sup>5</sup>  | 2.34 × 10 <sup>3</sup>  | 2.25   | 3.90 × 10 <sup>4</sup>                                   | 749                     | 1.92   |
